# Supplementary material
Source: PubMed Central journal article supplement (PMC6364565)

# Supplemental Figure 1

**A**

**Parenchymal**

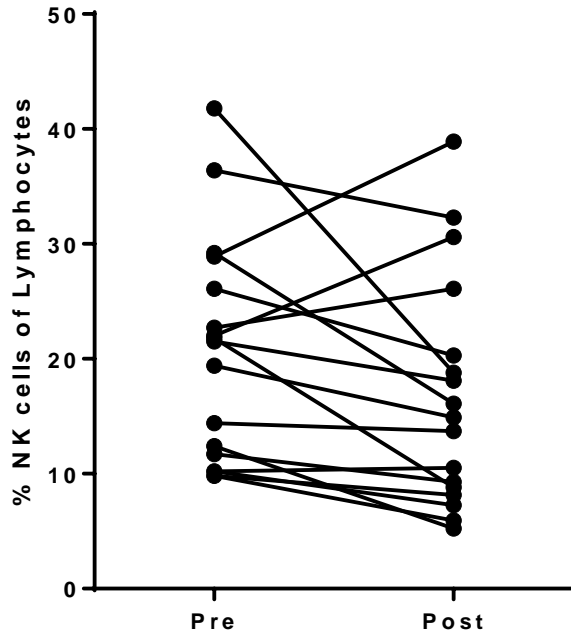

**B**

**Bone**

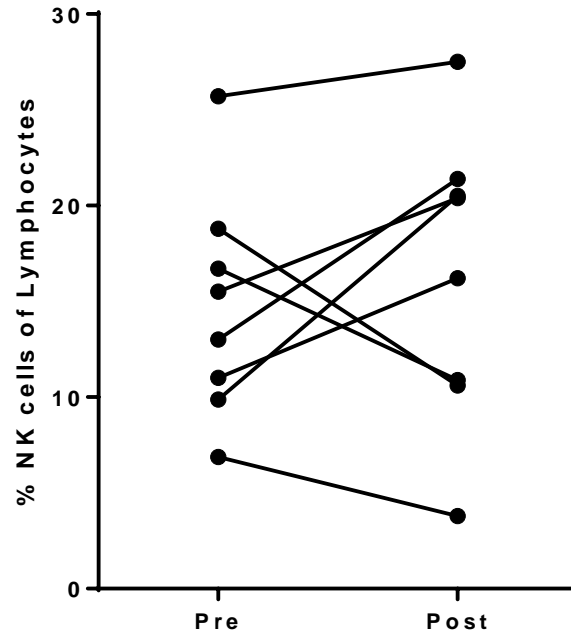

**C**

**Brain**

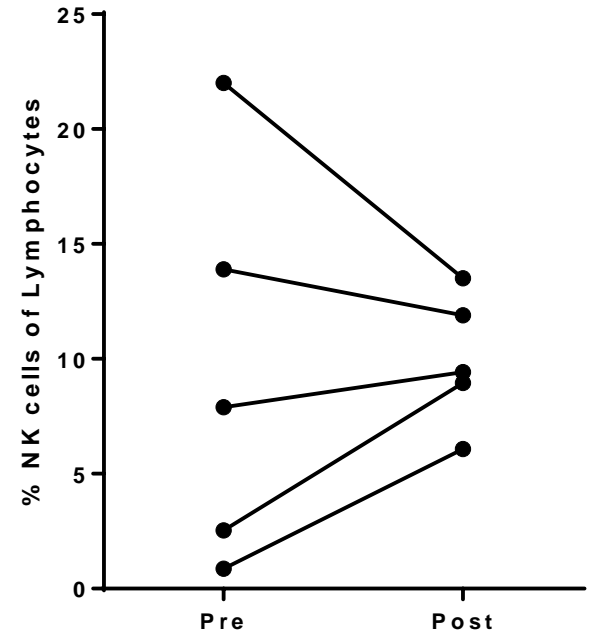

Supplement: NIHMS974274-supplement-Supplemental_Figure_1.pdf [file NIHMS974274-supplement-Supplemental_Figure_1.pdf]

# Supplemental Figure 2

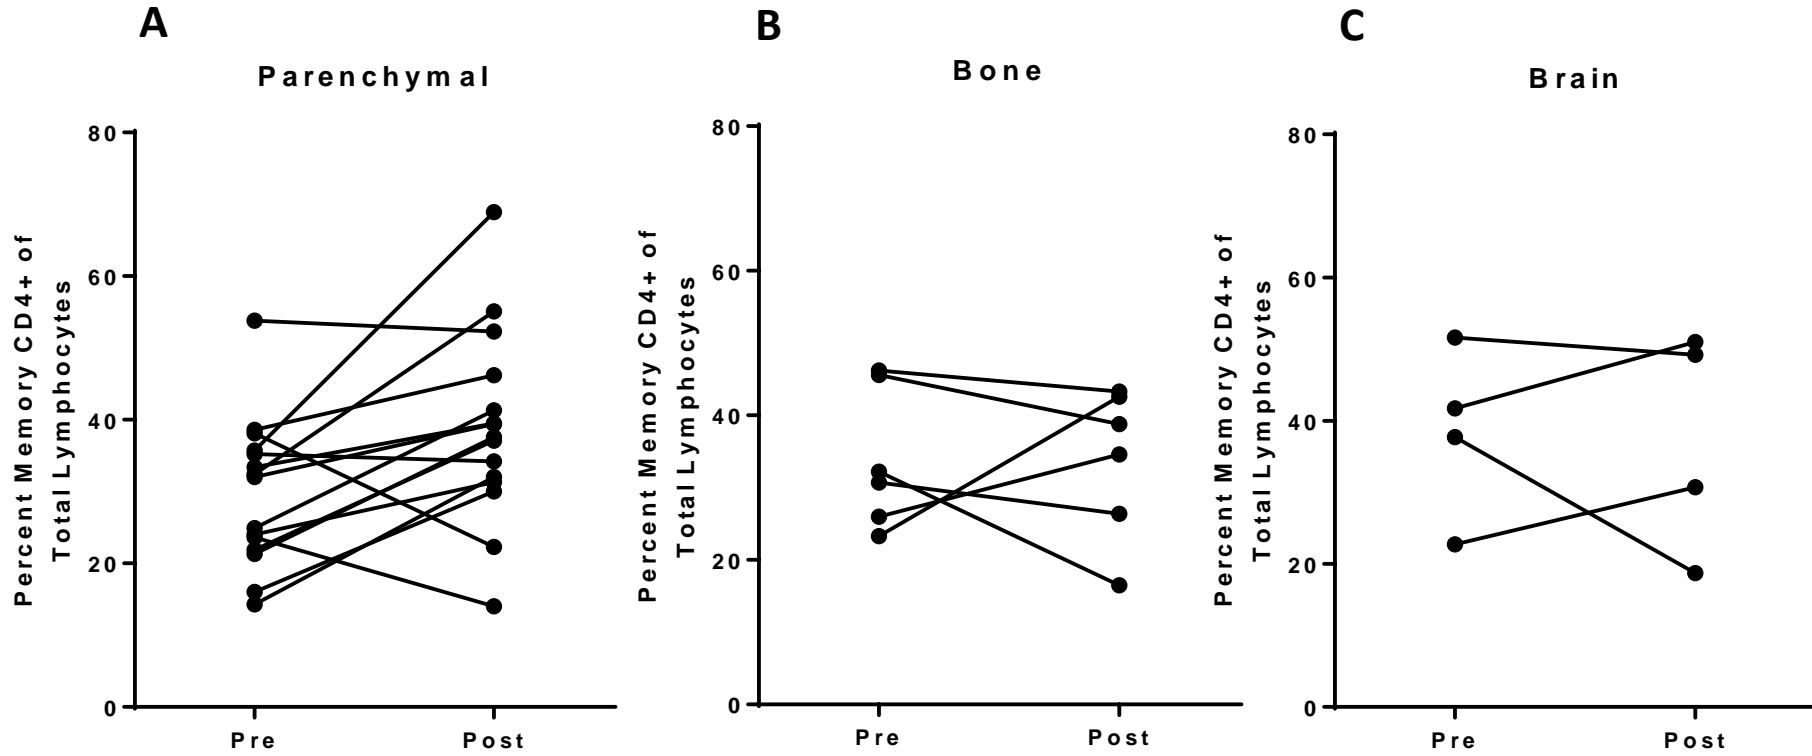

Supplement: NIHMS974274-supplement-Supplemental_Figure_2.pdf [file NIHMS974274-supplement-Supplemental_Figure_2.pdf]

# Supplemental Figure 3

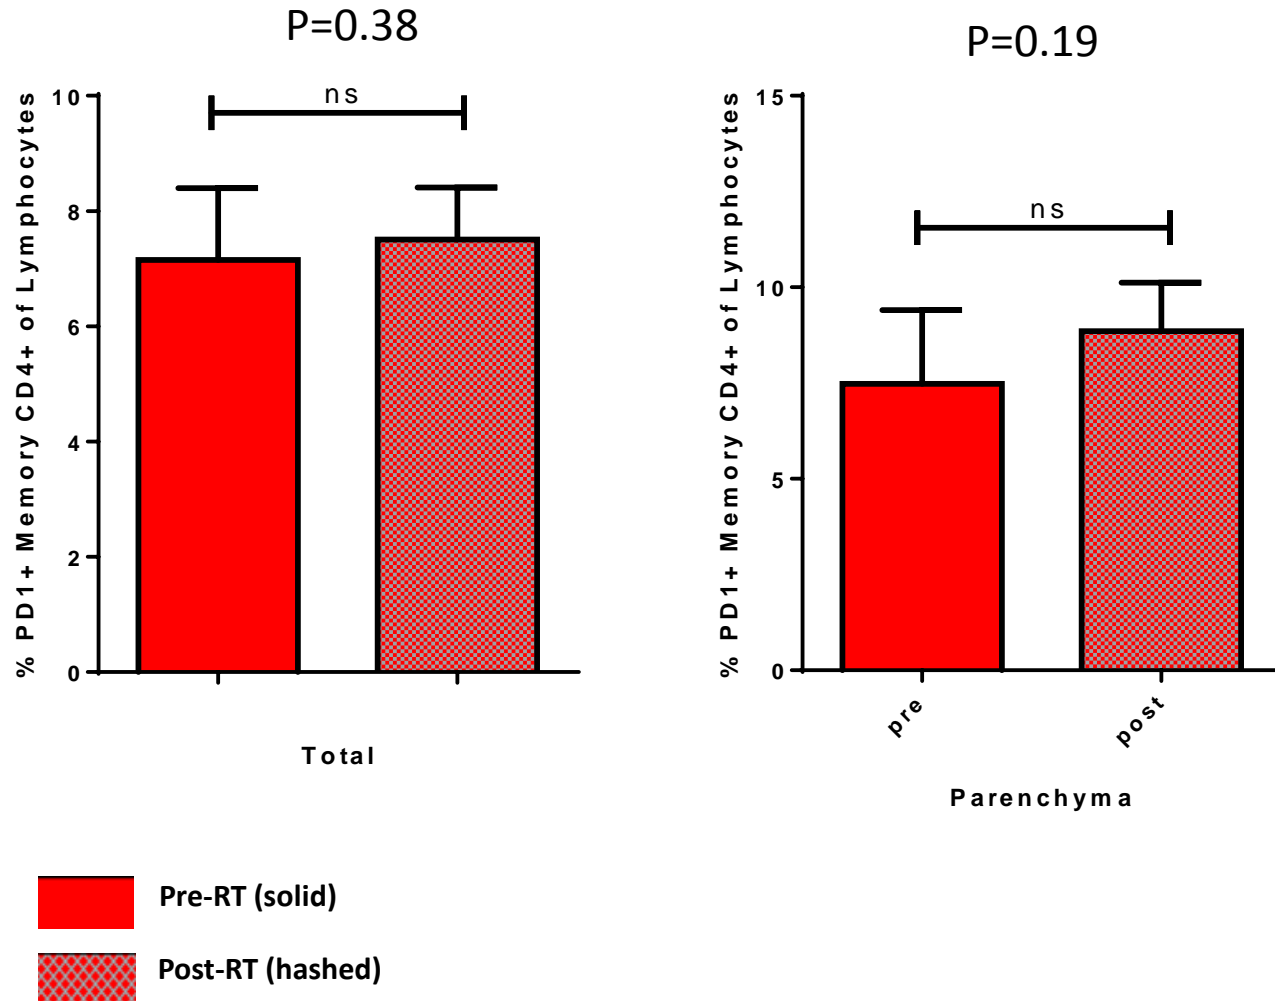

Supplement: NIHMS974274-supplement-Supplemental_Figure_3.pdf [file NIHMS974274-supplement-Supplemental_Figure_3.pdf]

# Supplemental Figure 4

**A**

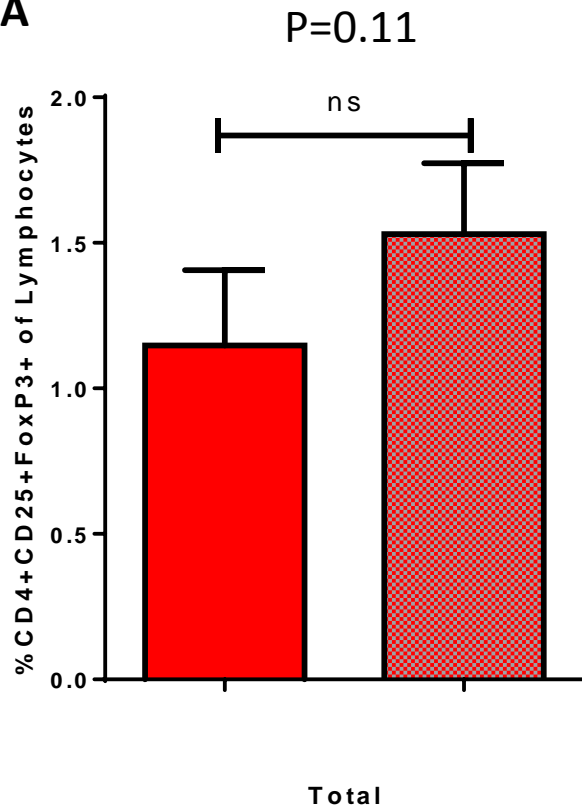

**B**

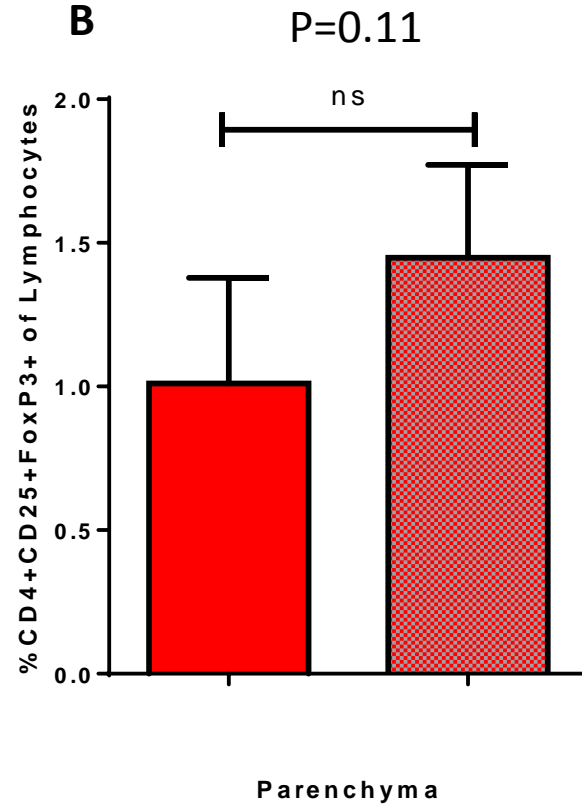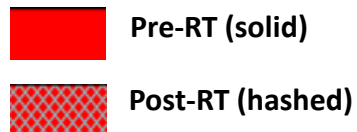

Supplement: NIHMS974274-supplement-Supplemental_Figure_4.pdf [file NIHMS974274-supplement-Supplemental_Figure_4.pdf]
